# Supplementary material for: Microwave regeneration of spent activated carbon for the treatment of ester-containing wastewater
Source: Royal Society of Chemistry journal article supplement (doi:10.1039/c6ra05211h), 2016-01-01
Supplement: c6ra05211h1.pdf [file c6ra05211h1.pdf]

## Electronic Supplementary Information

**Table S1.** The main composition of pollutants in the ester-containing wastewater.

| Contaminants                          | Molecular formula | Structural formula                                                                    |
|---------------------------------------|-------------------|---------------------------------------------------------------------------------------|
| Dimethyl carbonate (DMC)              | $C_3H_6O_3$       | 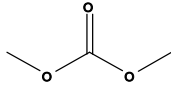   |
| Diethyl carbonate (DC)                | $C_5H_{10}O_3$    |    |
| Carbonic acid ethyl methylester (CEM) | $C_4H_8O_3$       |    |
| Ethylene carbonate (EC)               | $C_3H_4O_3$       |    |
| N-methylpyrrolidone (NMP)             | $C_5H_9NO$        |  |

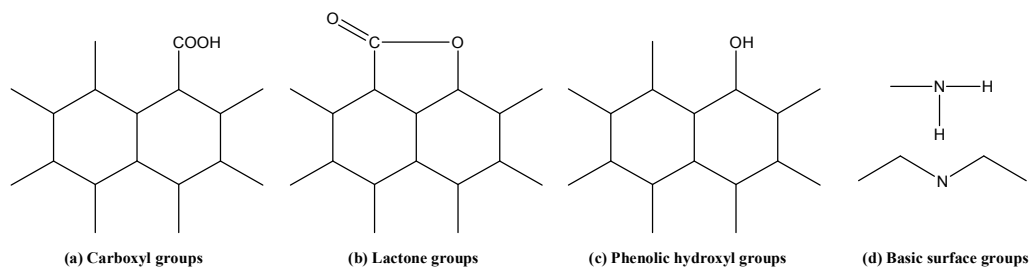

**Fig. S1.** The structural formula of the surface function groups of granular activated carbon (GAC).
